# Supplementary material
Source: publisher site journal article supplement (https://www.dovepress.com/article/436145)
Supplement: Supplementary file 1 [file get_supplementary_file.php]

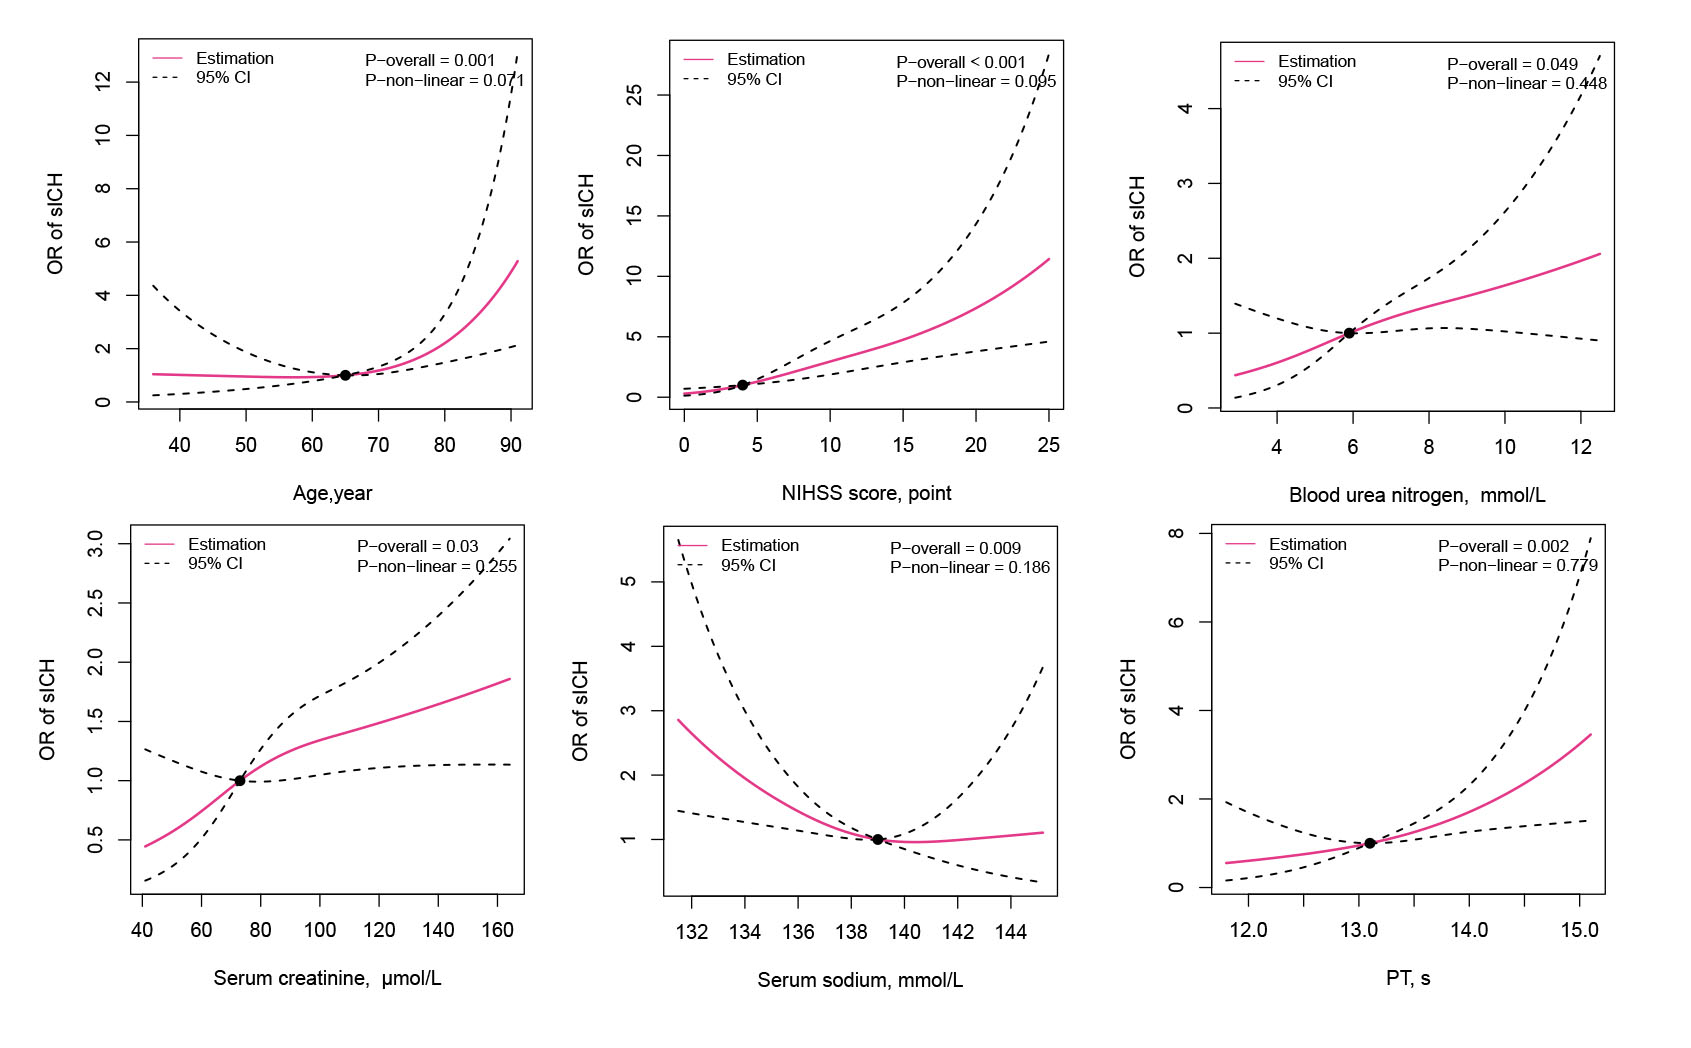
**Supplementary Figure 1:** Restricted cubic spline illustrated a linear relationship between all continuous variables and sICH. (*P* overall＜0.05, *P* nonlinear＞0.05)**.**
